# Supplementary material for: A possible role for neutrophils in allergic rhinitis revealed after cellular subclassification
Source: PubMed Central journal article supplement (PMC5341103; doi:10.1038/srep43568), 2017-03-08

## **A possible role for neutrophils in allergic rhinitis revealed after cellular subclassification**

Julia Arebro, Sandra Ekstedt, Eric Hjalmarsson, Ola Winqvist, Susanna Kumlien Georén, Lars-Olaf Cardell

### **SUPPLEMENTARY FILE**

#### **SUPPLEMENTARY FIGURE LEGENDS**

**Fig. S1. Flow cytometry data.** The expression of the activation marker CD66b correlated to activation level of neutrophils.

**Fig. S2. Co-cultures with activated neutrophils and T cells of AR-patients.** The (a) fraction and (b) MFI of CD69<sup>+</sup>/CD4<sup>+</sup> T cells primed with naïve and activated neutrophils. Control = no added neutrophils. \*Indicates statistical significance ( $p < 0.05$ ) (non-parametric (Friedman test) one-way ANOVA with Dunn's post-test). Data are shown as mean  $\pm$  S.E.M.

**Fig. S3. Gating procedures.** Gating procedures of T cells, verifying the CD4<sup>+</sup> T cells to be highly CD45RO<sup>-</sup>.

**Fig. S4. Monocyte analysis.** Analysis of monocyte impurities of T cell experiments revealing no increased activation in the wells containing activated neutrophils compared to control wells without neutrophils or with naïve neutrophils. Staining with Abs against CD14, CD80, CD86 and HLA-DR.

Supplementary Figure S1

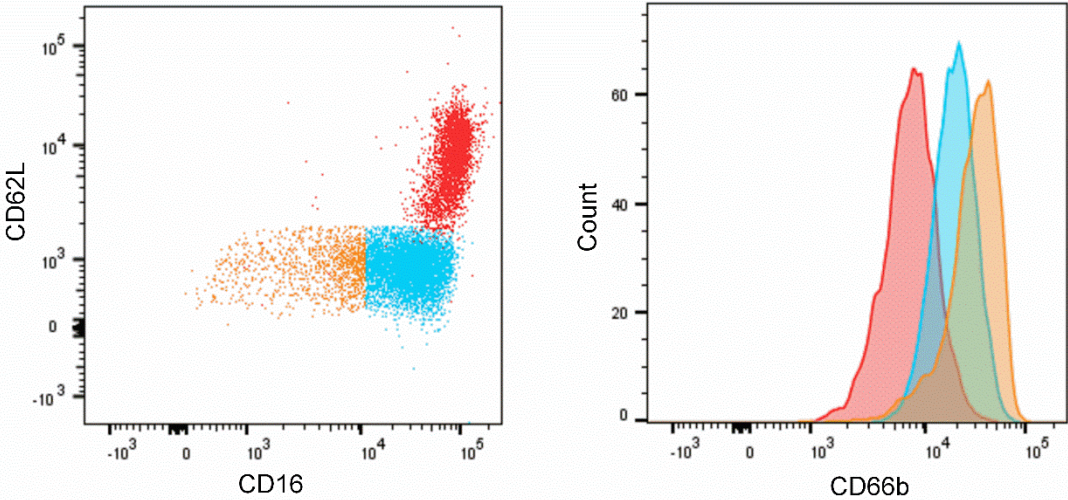

| <b>Neutrophil subset</b> |                               | <b>MFI CD66B</b> |
|--------------------------|-------------------------------|------------------|
| CD16 <sup>high</sup>     | CD62L <sup>high</sup> (red)   | 8,046            |
| CD16 <sup>high</sup>     | CD62L <sup>dim</sup> (blue)   | 20,503           |
| CD16 <sup>dim</sup>      | CD62L <sup>dim</sup> (orange) | 32,292           |

Supplementary Figure S2

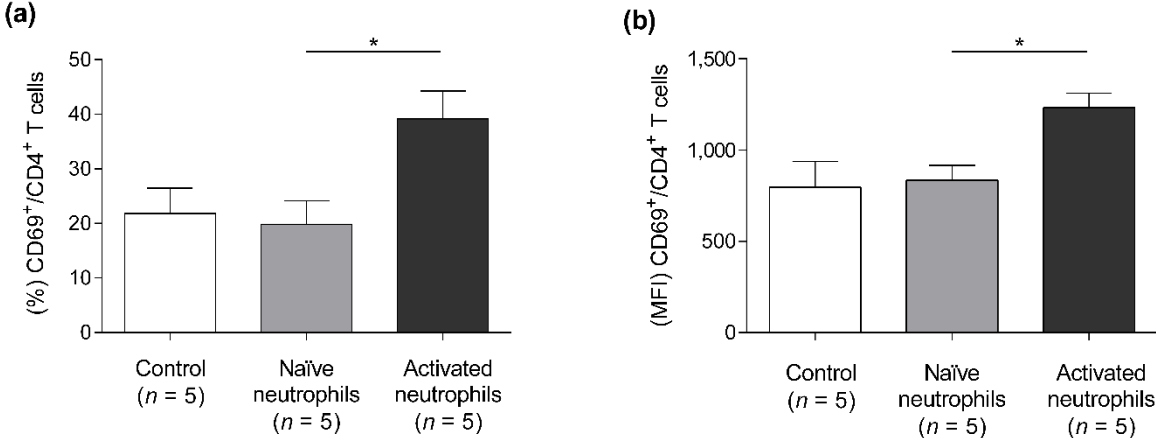

Supplementary Figure S3

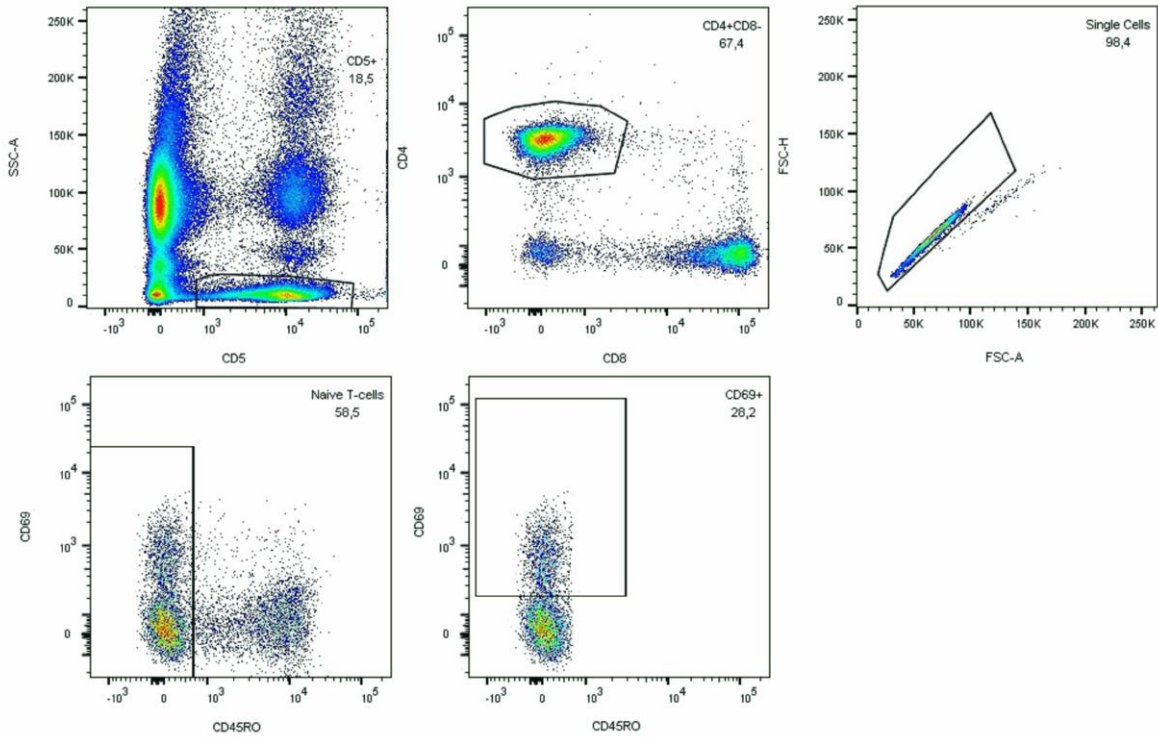

Supplementary Figure S4

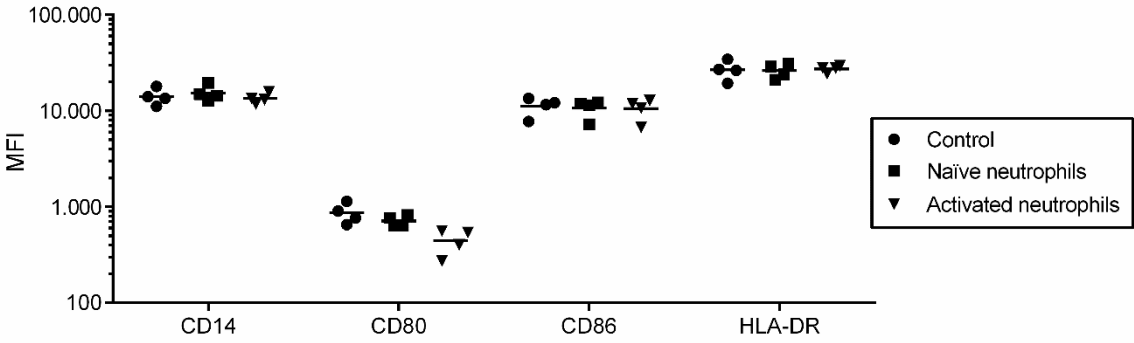

Supplement: srep43568-s1.pdf [file srep43568-s1.pdf]
